# Supplementary material for: Atopic Dermatitis: Molecular Alterations between Lesional and Non-Lesional Skin Determined Noninvasively by In Vivo Confocal Raman Microspectroscopy
Source: MDPI journal article supplement (doi:10.3390/ijms241914636), 2023-09-27
Supplement: s1 [file s1]

# **Atopic Dermatitis: Molecular Alterations between Lesional and Non-Lesional Skin Determined Noninvasively by In Vivo Confocal Raman Microspectroscopy**

**Michael Zolotas <sup>1</sup>, Johannes Schleusener <sup>1,\*</sup>, Jürgen Lademann <sup>1</sup>, Martina C. Meinke <sup>1</sup>, Georgios Kokolakis <sup>2</sup> and Maxim E. Darvin <sup>1,\*</sup>**

<sup>1</sup> Center of Experimental and Applied Cutaneous Physiology, Department of Dermatology, Venereology and Allergology, Charité – Universitätsmedizin Berlin, Corporate Member of Freie Universität Berlin and Humboldt-Universität zu Berlin, Charitéplatz 1, 10117 Berlin, Germany

<sup>2</sup> Psoriasis Research and Treatment Centre, Department of Dermatology, Venereology and Allergology, Charité – Universitätsmedizin Berlin, Corporate Member of Freie Universität Berlin and Humboldt-Universität zu Berlin, Charitéplatz 1, 10117 Berlin, Germany

\* Correspondence: johannes.schleusener@charite.de (J.S.); maxim.darvin@protonmail.com (M.E.D.)

**Supplementary Table S1.** Demographics and lesions of all recruited AD patients (AD: atopic dermatitis; F: female, M: male; I: infancy (aged 0–2), C: childhood (aged 3–13), PA: puberty/adulthood (aged ≥14); EASI: Eczema Area and Severity Index (4 numbers from left to right: erythema, oedema/papulation, excoriation and lichenification of the lesion); (n)LAS: (non)lesional atopic skin).

| Patient-ID | Age | Sex | AD age onset | Skin Type | Number of lesions | Local EASI score            | LAS profiles | nLAS profiles | Excluded profiles with reason of exclusion          |
|------------|-----|-----|--------------|-----------|-------------------|-----------------------------|--------------|---------------|-----------------------------------------------------|
| 1          | 37  | M   | I            | II        | 1                 | 1 1 0 1                     | 6            | 6             | LAS: ambiguity between LAS/nLAS                     |
| 2          | 31  | M   | I            | II        | 1                 | 2 1 1 0                     | 6            | 6             | LAS: ambiguity between LAS/nLAS                     |
| 3          | 53  | M   | C            | II        | 1                 | 2 1 1 0                     | 6            | 6             |                                                     |
| 4          | 38  | F   | I            | II        | 2                 | 2 1 1 0 / 1 1 0 0           | 4 / 2        | 6             |                                                     |
| 5          | 31  | F   | PA           | II        | 1                 | 1 1 0 0                     | 6            | 6             |                                                     |
| 6          | 48  | F   | C            | II        | 2                 | 2 0 0 0 / 1 0 0 0           | 3 / 3        | 6             | LAS + nLAS: use of cortisone prior to measurement   |
| 7          | 28  | F   | I            | II        | 2                 | 2 1 3 0 / 2 1 2 0           | 5 / 1        | 6             |                                                     |
| 8          | 55  | M   | I            | III       | 2                 | 1 1 0 0 / 2 1 0 0           | 4 / 2        | 6             | LAS + nLAS: use of cortisone prior to measurement   |
| 9          | 20  | M   | I            | II        | 2                 | 2 1 2 1 / 3 1 0 0           | 3 / 3        | 6             |                                                     |
| 10         | 46  | M   | I            | II        | 2                 | 2 0 0 0 / 2 0 0 0           | 3 / 3        | 6             |                                                     |
| 11         | 29  | M   | C            | II        | 1                 | 2 1 1 0                     | 6            | 6             |                                                     |
| 12         | 22  | M   | C            | II        | 3                 | 2 1 2 0 / 1 0 0 0 / 2 1 1 0 | 3 / 3 / 2    | 6             | LAS + nLAS: instability/movement during measurement |
| 13         | 29  | M   | I            | III       | 1                 | 1 0 0 0                     | 6            | 6             | LAS + nLAS: ambiguity between LAS/nLAS              |
| 14         | 40  | M   | C            | III       | 2                 | 2 1 1 1                     | 3            | 6             | nLAS: ambiguity between nLAS/LAS                    |
| 15         | 31  | M   | I            | II        | 2                 | 1 0 1 0 / 0 1 0 1           | 3 / 3        | 6             | LAS + nLAS: use of cortisone prior to measurement   |
| 16         | 37  | F   | C            | III       | 2                 | 2 0 0 0 / 2 2 1 1           | 4 / 4        | 6             | LAS + nLAS: instability/movement during measurement |
| 17         | 35  | F   | I            | III       | 1                 | 1 1 0 0                     | 6            | 6             | LAS: instability/movement during measurement        |
| 18         | 32  | F   | I            | III       | 2                 | 2 1 0 0 / 1 1 0 0           | 6 / 1        | 6             |                                                     |
| 19         | 33  | F   | I            | III       | 1                 | 2 1 0 0                     | 6            | 6             | nLAS: ambiguity between nLAS/LAS                    |
| 20         | 23  | F   | C            | III       | 2                 | 1 0 1 0 / 2 1 0 1           | 3 / 4        | 6             |                                                     |
| 21         | 23  | M   | I            | III       | 1                 | 2 1 1 1                     | 6            | 6             |                                                     |

**Supplementary Table S2.** Demographics and lesions of the AD patients after exclusion of inadequate profiles indicating successful SC-Th determination (AD: atopic dermatitis, SC-Th: stratum corneum thickness; F: female, M: male; I: infancy (aged 0–2), C: childhood (aged 3–13), PA: puberty/adulthood (aged ≥14); EASI: Eczema Area and Severity Index (4 numbers from left to right: erythema, oedema/papulation, excoriation and lichenification of the lesion); (n)LAS: (non)lesional atopic skin).

| Patient-ID | Age | Sex | AD age onset | Skin Type | Number of lesions | Local EASI score  | LAS profiles | nLAS profiles | LAS with SC-Th | nLAS with SC-Th |
|------------|-----|-----|--------------|-----------|-------------------|-------------------|--------------|---------------|----------------|-----------------|
| 1          | 37  | M   | I            | II        | 0                 |                   | 0            | 6             | 0              | 2               |
| 2          | 31  | M   | I            | II        | 0                 |                   | 0            | 6             | 0              | 4               |
| 3          | 53  | M   | C            | II        | 1                 | 2 1 1 0           | 6            | 6             | 4              | 3               |
| 4          | 38  | F   | I            | II        | 2                 | 2 1 1 0 / 1 1 0 0 | 4 / 2        | 6             | 2 / 2          | 4               |
| 5          | 31  | F   | PA           | II        | 1                 | 1 1 0 0           | 6            | 6             | 6              | 6               |
| 6          | 28  | F   | I            | II        | 2                 | 2 1 3 0 / 2 1 2 0 | 5 / 1        | 6             | 2 / 1          | 6               |
| 7          | 20  | M   | I            | II        | 2                 | 2 1 2 1 / 3 1 0 0 | 3 / 3        | 6             | 0 / 3          | 4               |
| 8          | 46  | M   | I            | II        | 2                 | 2 0 0 0 / 2 0 0 0 | 3 / 3        | 6             | 2 / 1          | 6               |
| 9          | 29  | M   | C            | II        | 1                 | 2 1 1 0           | 6            | 6             | 2              | 6               |
| 10         | 40  | M   | C            | III       | 1                 | 2 1 1 1           | 3            | 0             | 0              | 0               |
| 11         | 35  | F   | I            | III       | 0                 |                   | 0            | 6             | 0              | 5               |
| 12         | 32  | F   | I            | III       | 2                 | 2 1 0 0 / 1 1 0 0 | 6 / 1        | 6             | 4 / 0          | 6               |
| 13         | 33  | F   | I            | III       | 1                 | 2 1 0 0           | 6            | 0             | 5              | 0               |
| 14         | 23  | F   | C            | III       | 2                 | 1 0 1 0 / 2 1 0 1 | 3 / 4        | 6             | 1 / 4          | 6               |
| 15         | 23  | M   | I            | III       | 1                 | 2 1 1 1           | 6            | 6             | 4              | 5               |

**Supplementary Table S3.** The detailed local EASI (Eczema Area and Severity Index) parameters of each atopic lesion used for the analysis after exclusion.

| Lesion number | Erythema | Oedema/Papulation | Excoriation | Lichenification | Sum |
|---------------|----------|-------------------|-------------|-----------------|-----|
| 1             | 2        | 1                 | 1           | 0               | 4   |
| 2             | 2        | 1                 | 1           | 0               | 4   |
| 3             | 1        | 1                 | 0           | 0               | 2   |
| 4             | 1        | 1                 | 0           | 0               | 2   |
| 5             | 2        | 1                 | 3           | 0               | 6   |
| 6             | 2        | 1                 | 2           | 0               | 5   |
| 7             | 2        | 1                 | 2           | 1               | 6   |
| 8             | 3        | 1                 | 0           | 0               | 4   |
| 9             | 2        | 0                 | 0           | 0               | 2   |
| 10            | 2        | 0                 | 0           | 0               | 2   |
| 11            | 2        | 1                 | 1           | 0               | 4   |
| 12            | 2        | 1                 | 1           | 1               | 5   |
| 13            | 2        | 1                 | 0           | 0               | 3   |
| 14            | 1        | 1                 | 0           | 0               | 2   |
| 15            | 2        | 1                 | 0           | 0               | 3   |
| 16            | 1        | 0                 | 1           | 0               | 2   |
| 17            | 2        | 1                 | 0           | 1               | 4   |
| 18            | 2        | 1                 | 1           | 1               | 5   |
